# Supplementary material for: Pyrimidine and s-triazine as structural motifs for ordered adsorption on Si(100): a first principles study
Source: Royal Society of Chemistry journal article supplement (doi:10.1039/c5cp01742d), 2015-01-01
Supplement: c5cp01742d1.pdf [file c5cp01742d1.pdf]

**Supporting Information for “Pyrimidine and s-Triazine as  
Structural Motifs for Ordered Adsorption on Si(100): a First  
Principles Study ”**

Wilson K.H. Ng<sup>1</sup>, J.W. Liu<sup>2</sup>, and Zhi-Feng Liu<sup>1,\*</sup>

<sup>1</sup>Department of Chemistry

and

Centre for Scientific Modeling and Computation

Chinese University of Hong Kong

Shatin, Hong Kong, China

and

<sup>2</sup>National Supercomputing Center in Shenzhen

Shenzhen, China

---

\*To who correspondence should be addressed. Email: [zfliu@cuhk.edu.hk](mailto:zfliu@cuhk.edu.hk) fax: ++852-2603-

# Contents

|                                                                                 |            |
|---------------------------------------------------------------------------------|------------|
| <b>On-dimer [4+2] addition paths for pyrimidine.....</b>                        | <b>3</b>   |
| <b>Interdimer [4+2] addition paths for pyrimidine.....</b>                      | <b>4</b>   |
| <b>Path for the formation of a dative bond next to a NN-CRB structure .....</b> | <b>5</b>   |
| <b>Decomposition paths for pyrimidine .....</b>                                 | <b>6,7</b> |
| <b>Decomposition paths for s-triazine .....</b>                                 | <b>8</b>   |

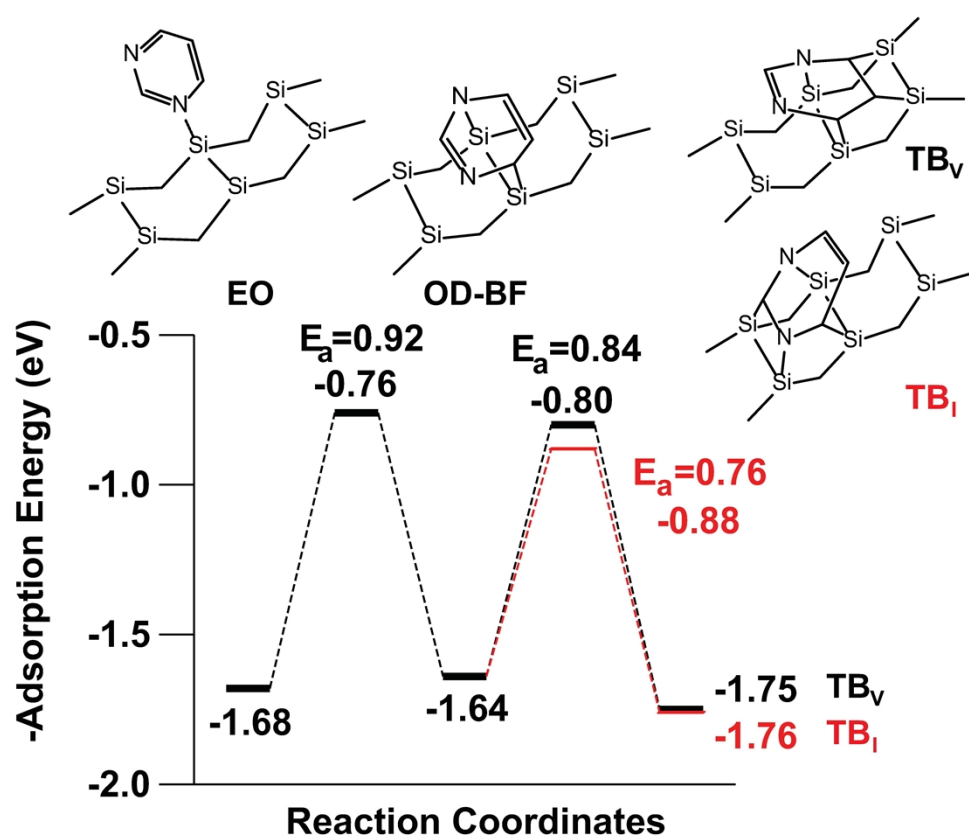

Fig.1 On-dimer [4+2] addition paths of pyrimidine End-On structure followed by tight-bridge formation.

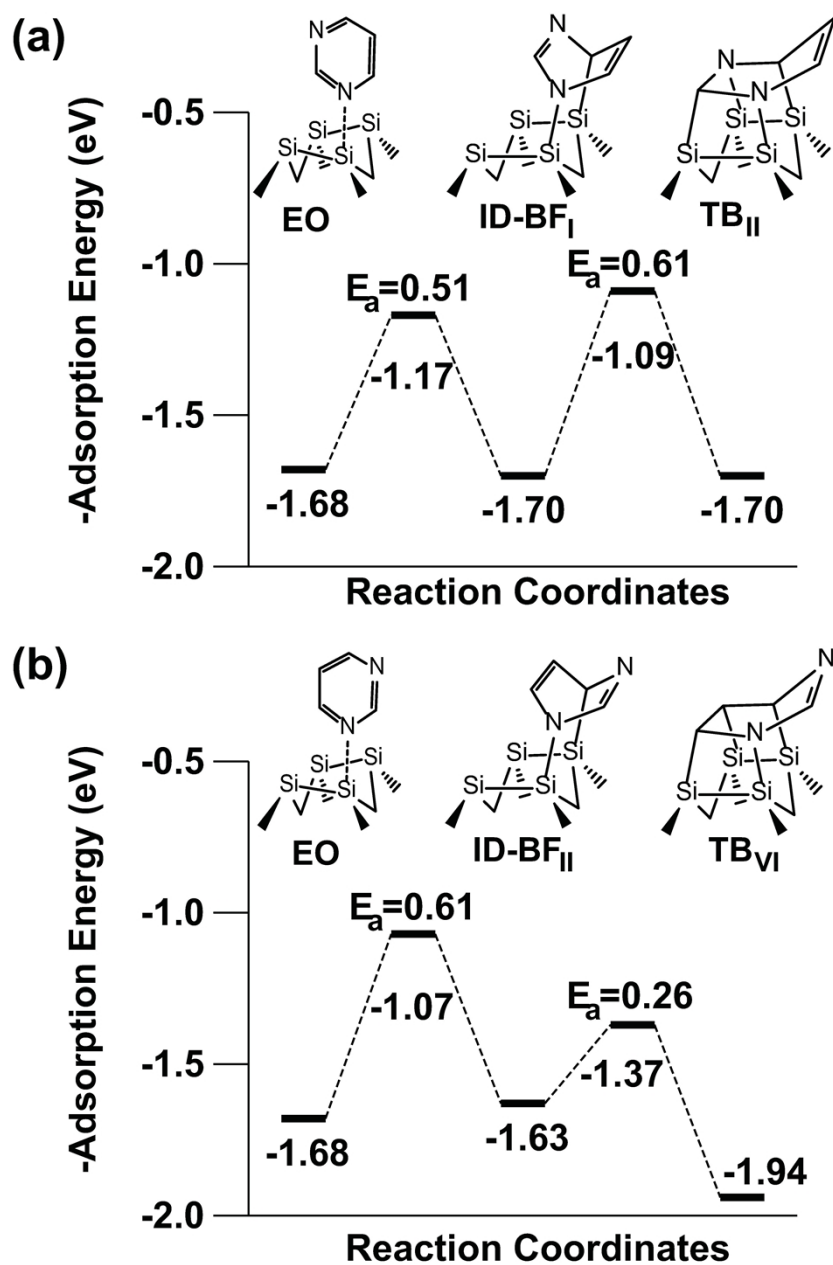

Fig.2 Interdimer [4+2] addition paths of pyrimidine End-On structure followed by tight-bridge formation.

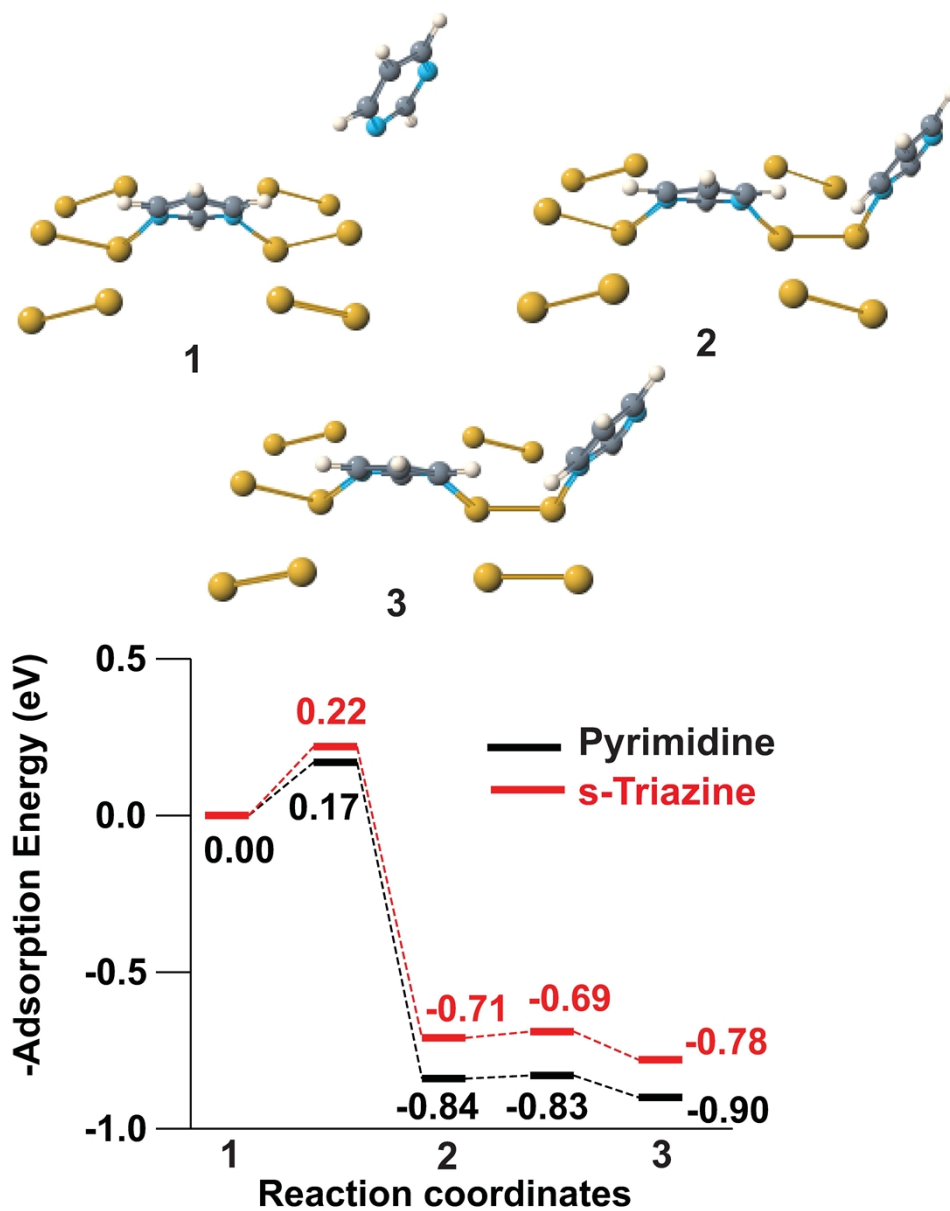

Fig.3 The formation of 1D line by NN-CRB structure. There is a barrier for the formation of the N-Si dative bond, since the Si atom is tilted up. These reactions are simulated using a 4x4 unit cell. Only 6 of the dimers and the two molecules are shown.

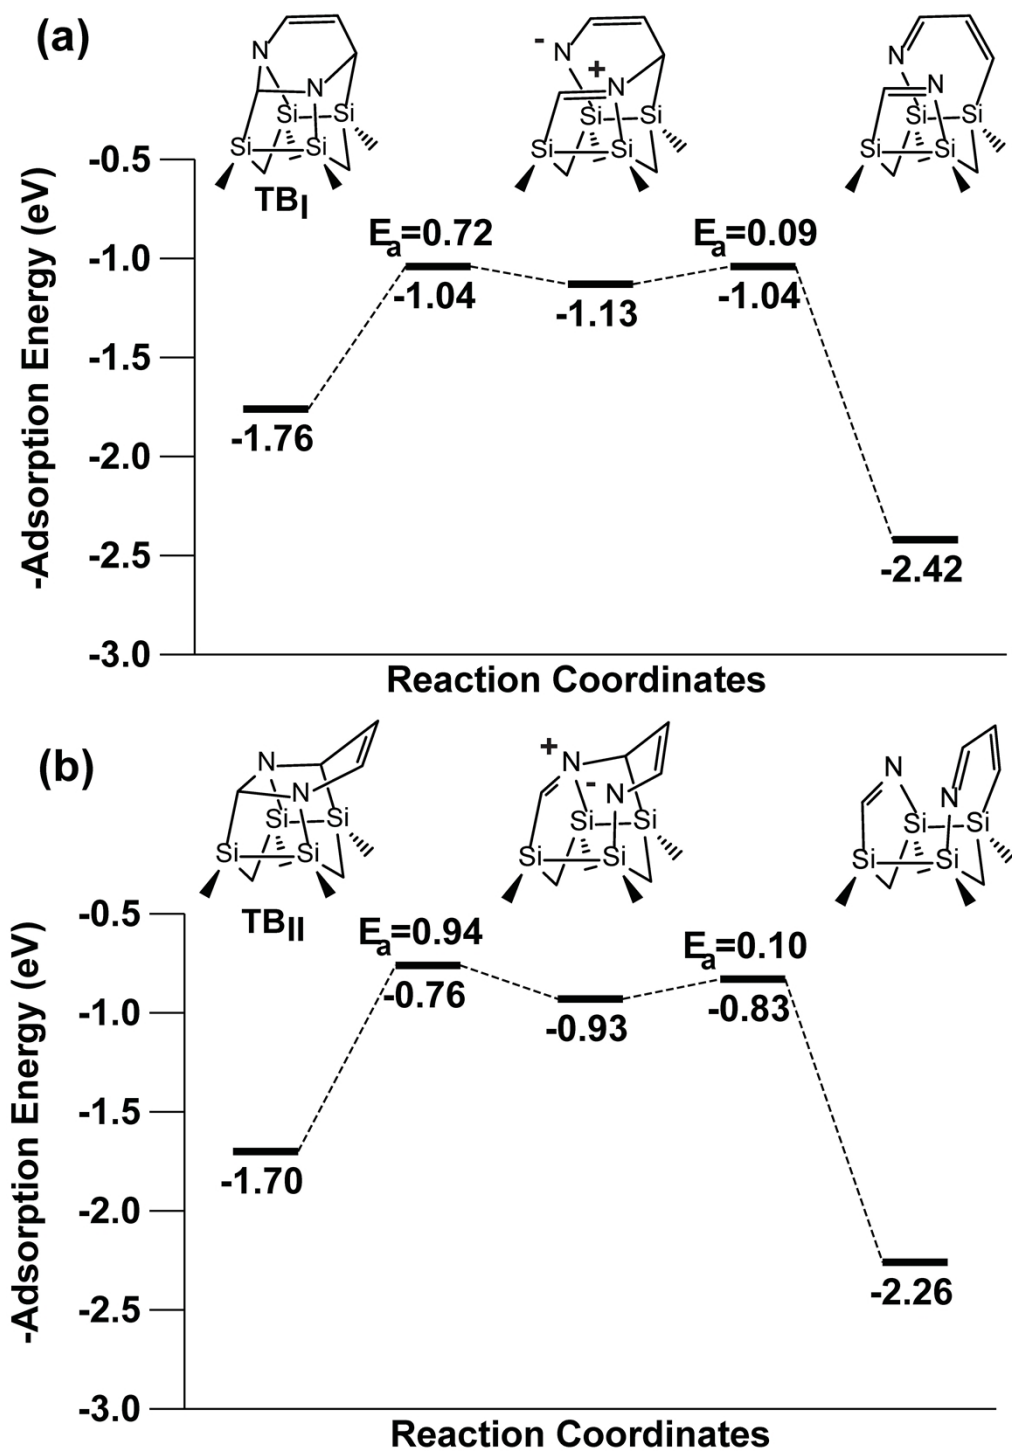

Fig.4 Two decomposition paths of pyrimidine on surface with the lowest barriers.

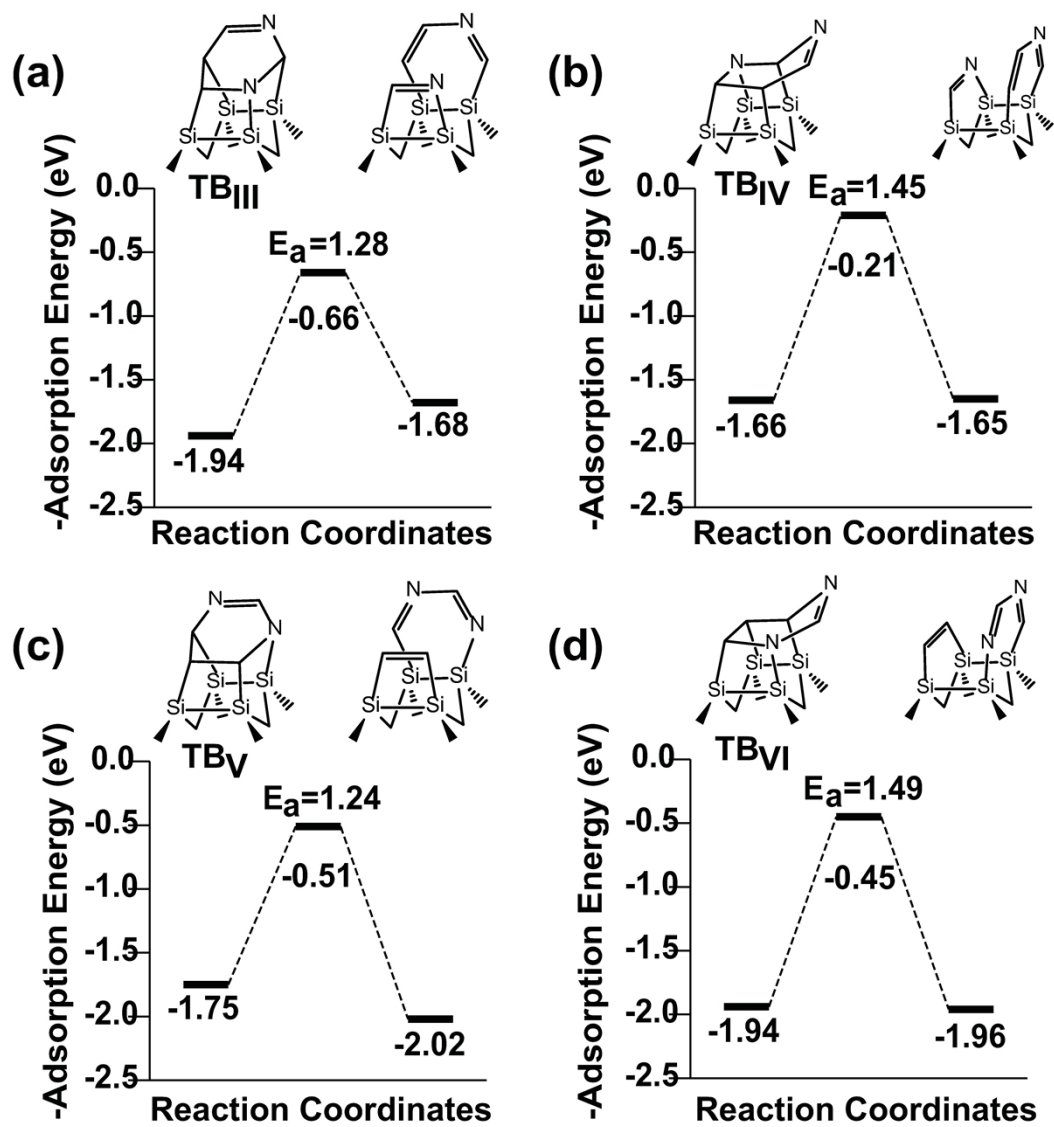

Fig.5 Four other decomposition paths of pyrimidine on surface with higher barrier.

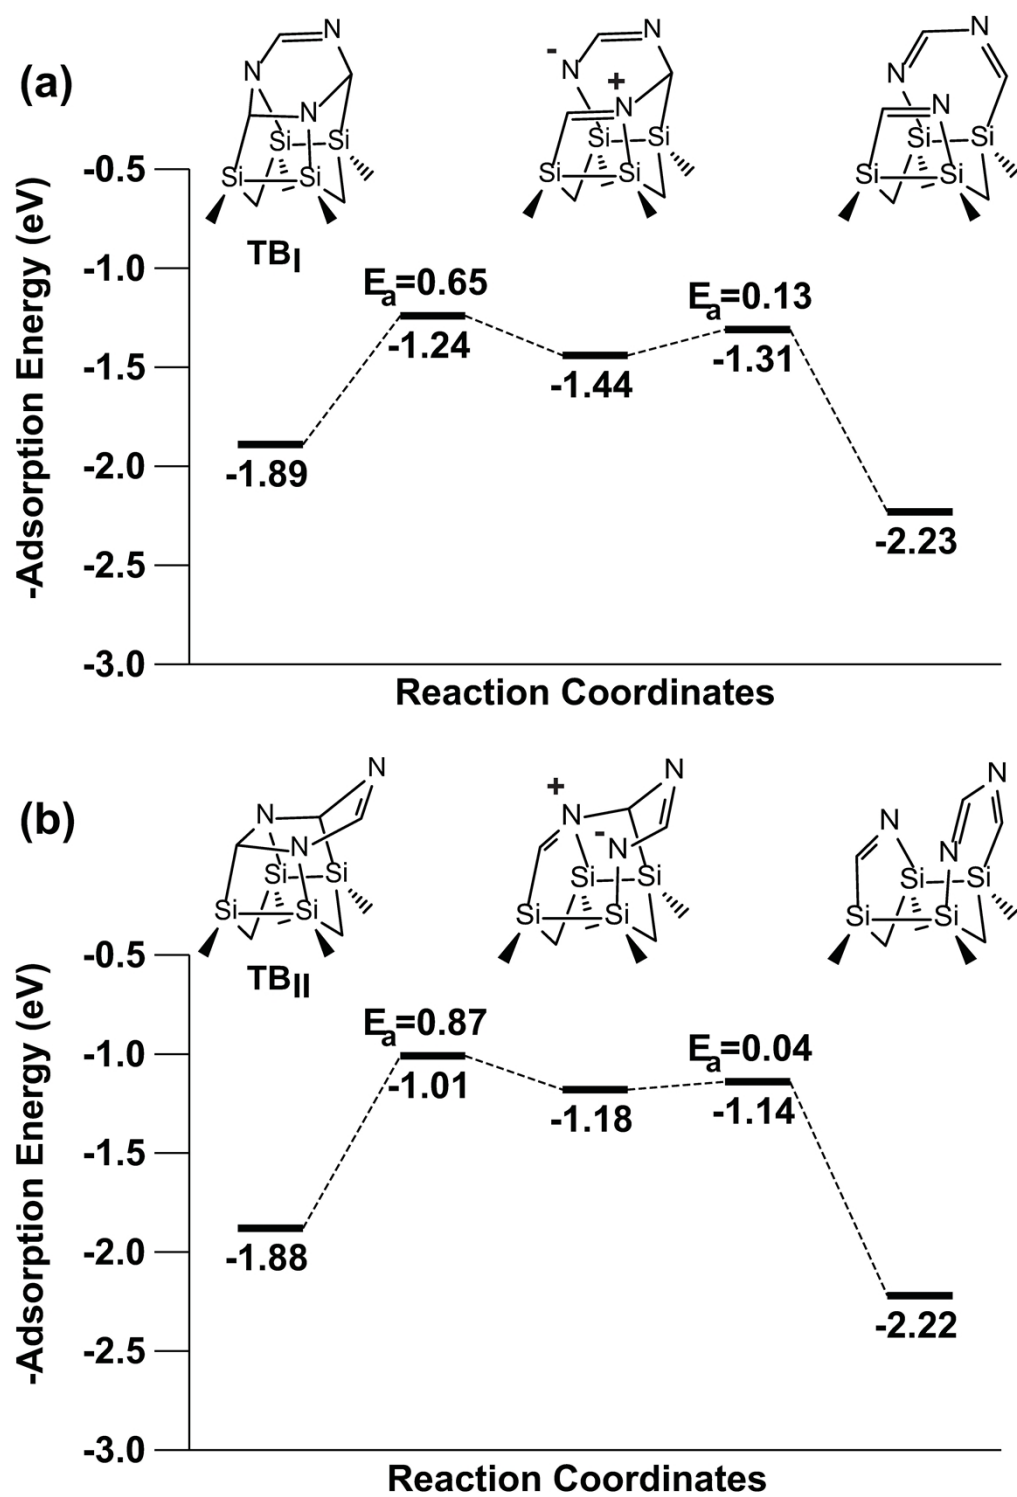

Fig.6 Decomposition paths for s-triazine adsorbed on Si(100).
